# Supplementary material for: Structure and dynamics of liquid water from ab initio simulations: adding Minnesota density functionals to Jacob's ladder
Source: Royal Society of Chemistry journal article supplement (doi:10.1039/d3sc05828j), 2024-01-01
Supplement: d3sc05828j1.pdf [file d3sc05828j1.pdf]

## Structure and dynamics of liquid water from ab initio simulations: Adding Minnesota density functionals to Jacob’s ladder

Justin Villard<sup>a</sup>, Martin P. Bircher<sup>b</sup>, and Ursula Rothlisberger<sup>\*a</sup>

<sup>a</sup>Laboratory of Computational Chemistry and Biochemistry, Institute of Chemical Sciences and Engineering, École Polytechnique Fédérale de Lausanne (EPFL), CH-1015 Lausanne, Switzerland

<sup>b</sup>Computational and Soft Matter Physics, Universität Wien, A-1090 Wien, Austria

E-mail: ursula.roethlisberger@epfl.ch

### Electronic supplementary information (ESI)

#### Simulation details

Table S1 Simulation details (production phase) for the different density functionals studied. M06-2X<sup>a</sup> corresponds to a similar simulation protocol conducted at larger wavefunction cutoff  $E_{cut}^{\phi} = 120$  Ry, against 80 Ry for other trajectories. The BLYP GGA functional is shown for comparison.

| Functional          | $N_{mol}$           | Dynamics | $t_{traj}$ [ps] | $n$ | $\Delta t$ [a.u.   fs] | $\bar{t}^{outer}$ [min] | $\bar{t}^{inner}$ [min] | Speedup | $\bar{t}_{sim}$ [days/ps] | $(dE/dt)_{max}$ [a.u./ps   %]   |  |
|---------------------|---------------------|----------|-----------------|-----|------------------------|-------------------------|-------------------------|---------|---------------------------|---------------------------------|--|
| Meta-GGA            |                     |          |                 |     |                        |                         |                         |         |                           |                                 |  |
| M06-L               | 64 D <sub>2</sub> O | CP       | 10.0            | 1   | 2.0   0.048            | -                       | 0.029                   | -       | 0.42                      | 0.000015   1 · 10 <sup>-6</sup> |  |
| revM06-L            | 64 D <sub>2</sub> O | CP       | 10.0            | 1   | 3.5   0.085            | -                       | 0.035                   | -       | 0.28                      | 0.000003   3 · 10 <sup>-7</sup> |  |
| M11-L               | 64 D <sub>2</sub> O | CP       | 10.2            | 1   | 3.5   0.085            | -                       | 0.037                   | -       | 0.30                      | 0.000919   8 · 10 <sup>-5</sup> |  |
| MN12-L              | 64 D <sub>2</sub> O | CP       | 10.2            | 1   | 3.5   0.085            | -                       | 0.031                   | -       | 0.26                      | 0.000003   2 · 10 <sup>-7</sup> |  |
| MN15-L              | 64 D <sub>2</sub> O | CP       | 10.2            | 1   | 3.0   0.073            | -                       | 0.027                   | -       | 0.26                      | 0.000009   9 · 10 <sup>-7</sup> |  |
| Hybrid meta-GGA     |                     |          |                 |     |                        |                         |                         |         |                           |                                 |  |
| M06                 | 32 H <sub>2</sub> O | ML-MTS   | 6.0             | 6   | 90.0   2.177           | 88.82                   | 0.08                    | 5.97    | 30                        | 0.004870   9 · 10 <sup>-4</sup> |  |
| M06-HF              | 32 H <sub>2</sub> O | ML-MTS   | 6.0             | 6   | 90.0   2.177           | 41.72                   | 0.09                    | 5.92    | 14                        | 0.003075   6 · 10 <sup>-4</sup> |  |
| M06-2X              | 32 H <sub>2</sub> O | ML-MTS   | 7.1             | 10  | 150.0   3.628          | 21.75                   | 0.10                    | 9.57    | 4                         | 0.001272   2 · 10 <sup>-4</sup> |  |
| M06-2X <sup>a</sup> | 32 H <sub>2</sub> O | ML-MTS   | 7.0             | 10  | 150.0   3.628          | 42.83                   | 0.19                    | 9.58    | 7                         | 0.000823   1 · 10 <sup>-4</sup> |  |
| M08-HX              | 32 H <sub>2</sub> O | ML-MTS   | 8.7             | 6   | 90.0   2.177           | 16.94                   | 0.09                    | 5.81    | 6                         | 0.000621   1 · 10 <sup>-4</sup> |  |
| M08-SO              | 32 H <sub>2</sub> O | ML-MTS   | 6.8             | 10  | 150.0   3.628          | 21.36                   | 0.10                    | 9.57    | 4                         | 0.005239   1 · 10 <sup>-3</sup> |  |
| M11                 | 32 H <sub>2</sub> O | ML-MTS   | 6.0             | 10  | 150.0   3.628          | 87.87                   | 0.16                    | 9.83    | 16                        | 0.003982   7 · 10 <sup>-4</sup> |  |
| MN12-SX             | 32 H <sub>2</sub> O | ML-MTS   | 6.0             | 6   | 90.0   2.177           | 18.91                   | 0.13                    | 5.77    | 6                         | 0.000833   2 · 10 <sup>-4</sup> |  |
| MN15                | 32 H <sub>2</sub> O | ML-MTS   | 6.0             | 10  | 150.0   3.628          | 35.12                   | 0.10                    | 9.72    | 7                         | 0.007592   1 · 10 <sup>-3</sup> |  |
| GGA                 |                     |          |                 |     |                        |                         |                         |         |                           |                                 |  |
| BLYP                | 32 H <sub>2</sub> O | BO       | 20.0            | 1   | 15.0   0.363           | -                       | 0.029                   | -       | 0.06                      | 0.003504   6 · 10 <sup>-4</sup> |  |

$N_{mol}$  is the number of heavy water molecules (D<sub>2</sub>O), respectively light water (H<sub>2</sub>O), simulated with meta-GGAs and hybrid meta-GGAs.

CP stands for Car-Parrinello dynamics while ML-MTS means Born-Oppenheimer (BO) dynamics accelerated with the machine-learning enhanced multiple time step scheme<sup>119</sup>.

$t_{traj}$  is the simulation length of the production phase.  $n$  is the ratio between inner and outer time steps when the ML-MTS scheme is used.  $\Delta t = \delta t$  corresponds to the time step for CP dynamics, while for the ML-MTS scheme  $\Delta t = n \cdot \delta t$  corresponds to the outer (physical) time step.

$\bar{t}^{outer/inner}$  are the averaged elapsed times taken per outer/inner time step. We also report the ML-MTS speedup against standard BO dynamics from  $\bar{t}^{outer}$  and  $\bar{t}^{inner}$ .  $\bar{t}_{sim}$  is the running time in order to get 1 ps of trajectory. Timings are reported for a full distribution of MPI tasks over 16 (13) Intel Xeon E5-2690 v3 @ 2.60GHz nodes with 12 cores each for respectively the meta-GGAs (hybrid meta-GGAs).

$(dE/dt)_{max}$  represents the maximum energy fluctuation per time observed along each trajectory, in absolute and relative value compared to the average energy of the system.

## Basis set convergence

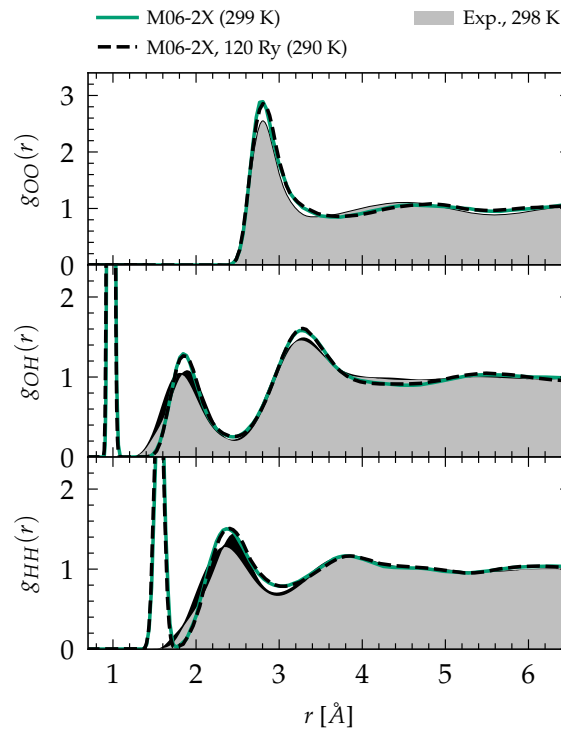

Fig. S1 Oxygen-oxygen ( $g_{OO}$ ), oxygen-hydrogen ( $g_{OH}$ ) and hydrogen-hydrogen ( $g_{HH}$ ) radial distribution functions of liquid water predicted by the M06-2X Minnesota density functional, with a plane-wave wavefunction cutoff energy  $E_{cut}^{\phi} = 120$  Ry (black), against 80 Ry (green). The experimental reference for  $g_{OO}$  comes from X-ray diffraction<sup>54,55</sup> interpolated at 298 K<sup>197</sup> and joint X-ray/neutron diffraction experiments were used for  $g_{OH}$  and  $g_{HH}$ <sup>58</sup>. Black areas represent experimental uncertainties.

## Structural properties

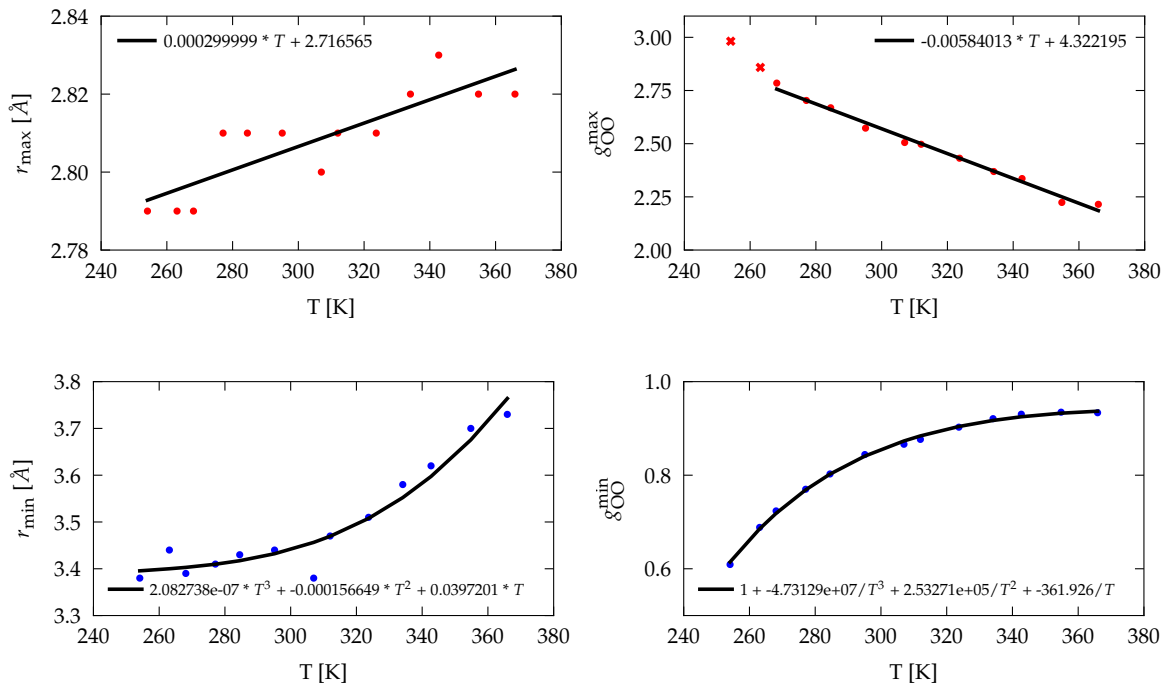

Fig. S2 Position  $r_{max}$  and height  $g_{OO}^{max}$  of the first peak of the  $g_{OO}$  distribution at different temperatures extracted from X-ray measurements<sup>55</sup>, as well as their first minimum analogues ( $r_{min}$ ,  $g_{OO}^{min}$ ). Shown are the fitting curves used to rescale the simulated data to a common 298 K temperature, assuming a temperature dependency of DFT functionals similar to the experiment.

Table S2 Structure of liquid water. Position [ $\text{\AA}$ ] and height of the first maximum ( $r_{\max}, g_{\text{OO}}^{\max}$ ) and first minimum ( $r_{\min}, g_{\text{OO}}^{\min}$ ) of the oxygen-oxygen radial distribution function as obtained from MD or MC simulations with various DFT functionals at temperature  $T_{\text{avg}}$  [K]. Their normalized analogues ( $r_{\max}^*, g_{\text{OO}}^{\max*}$ ) and ( $r_{\min}^*, g_{\text{OO}}^{\min*}$ ) rescaled to 298 K were calculated from the experimental fits of Fig. S2. Corresponding references (cf. main text) are provided alongside the functional names.

| Functional                                       | $T_{\text{avg}}$ | $T = T_{\text{avg}}$ |                        |            |                        | $T = 298 \text{ K}$ |                         |              |                         |
|--------------------------------------------------|------------------|----------------------|------------------------|------------|------------------------|---------------------|-------------------------|--------------|-------------------------|
|                                                  |                  | $r_{\max}$           | $g_{\text{OO}}^{\max}$ | $r_{\min}$ | $g_{\text{OO}}^{\min}$ | $r_{\max}^*$        | $g_{\text{OO}}^{\max*}$ | $r_{\min}^*$ | $g_{\text{OO}}^{\min*}$ |
| GGA                                              |                  |                      |                        |            |                        |                     |                         |              |                         |
| BLYP <sup>124</sup>                              | 319              | 2.77                 | 2.86                   | 3.31       | 0.66                   | 2.76                | 2.98                    | 3.26         | 0.61                    |
| BLYP-DCACP <sup>124</sup>                        | 308              | 2.79                 | 2.72                   | 3.36       | 0.85                   | 2.79                | 2.78                    | 3.34         | 0.82                    |
| BLYP-D3 <sup>154</sup>                           | 295              | 2.78                 | 2.78                   | 3.51       | 0.92                   | 2.78                | 2.76                    | 3.52         | 0.93                    |
| PBE <sup>124</sup>                               | 314              | 2.72                 | 3.19                   | 3.27       | 0.43                   | 2.72                | 3.28                    | 3.23         | 0.39                    |
| PBE-DCACP <sup>124</sup>                         | 323              | 2.71                 | 3.27                   | 3.28       | 0.40                   | 2.70                | 3.42                    | 3.21         | 0.35                    |
| PBE-D3 <sup>154</sup>                            | 295              | 2.73                 | 3.07                   | 3.25       | 0.69                   | 2.73                | 3.05                    | 3.26         | 0.70                    |
| revPBE <sup>124</sup>                            | 323              | 2.80                 | 2.38                   | 3.34       | 0.90                   | 2.79                | 2.53                    | 3.27         | 0.85                    |
| revPBE-DCACP <sup>124</sup>                      | 331              | 2.74                 | 2.94                   | 3.35       | 0.76                   | 2.73                | 3.13                    | 3.25         | 0.70                    |
| revPBE-D3 <sup>143</sup>                         | 298              | 2.81                 | 2.59                   | 3.52       | 0.89                   | 2.81                | 2.59                    | 3.52         | 0.89                    |
| rVV10 <sup>154</sup>                             | 295              | 2.73                 | 3.22                   | 3.32       | 0.79                   | 2.73                | 3.20                    | 3.33         | 0.80                    |
| optB88-vdW <sup>154</sup>                        | 295              | 2.74                 | 2.94                   | 3.34       | 0.80                   | 2.74                | 2.92                    | 3.35         | 0.81                    |
| Meta-GGA                                         |                  |                      |                        |            |                        |                     |                         |              |                         |
| M06-L                                            | 291              | 2.85                 | 2.36                   | 4.50       | 0.92                   | 2.85                | 2.32                    | 4.51         | 0.94                    |
| revM06-L                                         | 311              | 3.09                 | 2.37                   | 4.58       | 0.72                   | 3.09                | 2.45                    | 4.55         | 0.69                    |
| M11-L                                            | 286              | 2.89                 | 2.11                   | 4.59       | 0.86                   | 2.89                | 2.04                    | 4.61         | 0.90                    |
| MN12-L                                           | 296              | 3.13                 | 3.20                   | 4.31       | 0.45                   | 3.13                | 3.19                    | 4.31         | 0.46                    |
| MN15-L                                           | 283              | 3.37                 | 2.70                   | 4.61       | 0.43                   | 3.37                | 2.61                    | 4.63         | 0.48                    |
| SCAN <sup>40</sup>                               | 300              | 2.76                 | 3.24                   | 3.31       | 0.72                   | 2.76                | 3.25                    | 3.31         | 0.71                    |
| SCAN+rVV10 <sup>138</sup>                        | 300              | 2.74                 | 3.20                   | 3.32       | 0.65                   | 2.74                | 3.21                    | 3.32         | 0.64                    |
| TPSS <sup>140</sup>                              | 350              | 2.71                 | 3.40                   | 3.29       | 0.33                   | 2.69                | 3.70                    | 3.08         | 0.25                    |
| B97M-rV <sup>117</sup>                           | 300              | 2.83                 | 2.69                   | 3.61       | 0.91                   | 2.83                | 2.70                    | 3.61         | 0.90                    |
| Hybrid                                           |                  |                      |                        |            |                        |                     |                         |              |                         |
| B3LYP <sup>140</sup>                             | 350              | 2.79                 | 2.48                   | 3.40       | 0.81                   | 2.77                | 2.78                    | 3.19         | 0.73                    |
| PBE0 <sup>162</sup>                              | 300              | 2.71                 | 2.96                   | 3.30       | 0.53                   | 2.71                | 2.97                    | 3.30         | 0.52                    |
| PBE0-TS-vdW(SC) <sup>162</sup>                   | 300              | 2.72                 | 2.76                   | 3.31       | 0.70                   | 2.72                | 2.77                    | 3.31         | 0.69                    |
| PBE0-D3 <sup>154</sup>                           | 295              | 2.74                 | 2.88                   | 3.29       | 0.79                   | 2.74                | 2.86                    | 3.30         | 0.80                    |
| revPBE0-D3 <sup>117</sup>                        | 300              | 2.80                 | 2.57                   | 3.47       | 0.89                   | 2.80                | 2.58                    | 3.47         | 0.88                    |
| Hybrid meta-GGA                                  |                  |                      |                        |            |                        |                     |                         |              |                         |
| M06                                              | 312              | 2.85                 | 2.24                   | 4.70       | 0.91                   | 2.85                | 2.32                    | 4.67         | 0.88                    |
| M06-HF                                           | 329              | 2.65                 | 2.72                   | 3.22       | 0.63                   | 2.64                | 2.90                    | 3.13         | 0.57                    |
| M06-2X                                           | 299              | 2.81                 | 2.89                   | 3.74       | 0.85                   | 2.81                | 2.90                    | 3.74         | 0.85                    |
| M06-2X, $E_{\text{cut}}^{\phi} = 120 \text{ Ry}$ | 290              | 2.81                 | 2.86                   | 3.71       | 0.86                   | 2.81                | 2.81                    | 3.72         | 0.89                    |
| M08-HX                                           | 298              | 2.82                 | 2.96                   | 4.02       | 0.81                   | 2.82                | 2.96                    | 4.02         | 0.81                    |
| M08-SO                                           | 316              | 2.85                 | 3.01                   | 4.10       | 0.91                   | 2.84                | 3.12                    | 4.06         | 0.87                    |
| M11                                              | 326              | 2.85                 | 2.73                   | 3.91       | 0.96                   | 2.84                | 2.89                    | 3.83         | 0.90                    |
| MN12-SX                                          | 292              | 2.93                 | 2.91                   | 3.86       | 0.86                   | 2.93                | 2.87                    | 3.87         | 0.88                    |
| MN15                                             | 316              | 2.85                 | 2.30                   | 4.47       | 0.87                   | 2.84                | 2.41                    | 4.43         | 0.83                    |
| M06-2X-D3 <sup>154</sup>                         | 295              | 2.78                 | 3.00                   | 3.45       | 0.78                   | 2.78                | 2.98                    | 3.46         | 0.79                    |
| SCAN0/ML <sup>164</sup>                          | 300              | 2.76                 | 3.04                   | 3.30       | 0.70                   | 2.76                | 3.05                    | 3.30         | 0.69                    |
| Post-HF, double-hybrid                           |                  |                      |                        |            |                        |                     |                         |              |                         |
| RPA <sup>154</sup>                               | 295              | 2.78                 | 2.93                   | 3.41       | 0.78                   | 2.78                | 2.91                    | 3.42         | 0.79                    |
| RPA/ML <sup>165</sup>                            | 300              | 2.79                 | 2.89                   | 3.41       | 0.83                   | 2.79                | 2.90                    | 3.41         | 0.82                    |
| MP2 <sup>154</sup>                               | 295              | 2.76                 | 3.05                   | 3.32       | 0.72                   | 2.76                | 3.03                    | 3.33         | 0.73                    |
| PWPB95-D3 <sup>154</sup>                         | 295              | 2.80                 | 2.80                   | 3.60       | 0.86                   | 2.80                | 2.78                    | 3.61         | 0.87                    |
| Experimental                                     |                  |                      |                        |            |                        |                     |                         |              |                         |
| X-ray 2014 <sup>55,197</sup>                     | 298              | 2.80                 | 2.55                   | 3.41       | 0.85                   | 2.80                | 2.55                    | 3.41         | 0.85                    |

Table S3 Structure of liquid water. Coordination number  $\bar{n}_{OO}$  calculated by integrating  $g_{OO}(r)$  up to its first minimum.  $n_{OO}$  is the coordination number calculated by the same integration up to the first minimum of the radial distribution  $4\pi r^2 g_{OO}(r)$  (eq 1 of the main text). Average number  $h$  of hydrogen bonds per water molecule and estimated equilibrium density  $\rho_{eq}$  [g/cm<sup>3</sup>] relative to the experimental one  $\rho_{exp}$ <sup>192</sup> at same temperature. Results were obtained from MD or MC simulations with various DFT functionals at temperature  $T_{avg}$  [K]. Corresponding references (cf. main text) are provided alongside the functional names.

| Functional                                               | $T_{avg}$ | $\bar{n}_{OO}$        | $n_{OO}$              | $h$                  | $\rho_{eq}$          | $\rho_{eq}/\rho_{exp}$ | System                                            |
|----------------------------------------------------------|-----------|-----------------------|-----------------------|----------------------|----------------------|------------------------|---------------------------------------------------|
| GGA                                                      |           |                       |                       |                      |                      |                        |                                                   |
| BLYP <sup>124</sup>                                      | 319       | 4.2                   | 4.0                   | 3.44                 | 1.010                | 0.92                   | D <sub>2</sub> O                                  |
| BLYP-DCACP <sup>124</sup>                                | 308       | 4.5                   | 4.2                   | 3.43                 | 1.135                | 1.03                   | D <sub>2</sub> O                                  |
| BLYP-D3 <sup>154</sup>                                   | 295       | 5.6                   | 5.1                   | *3.66                | 1.066                | 1.07                   | H <sub>2</sub> O                                  |
| PBE <sup>124</sup>                                       | 314       | 4.0                   | 4.0                   | 3.58                 | 1.056                | 0.96                   | D <sub>2</sub> O                                  |
| PBE-DCACP <sup>124</sup>                                 | 323       | 4.1                   | 4.0                   | 3.63                 | 1.063                | 0.97                   | D <sub>2</sub> O                                  |
| PBE-D3 <sup>154</sup>                                    | 295       | 4.3                   | 4.0                   | *3.64                | 1.053                | 1.06                   | H <sub>2</sub> O                                  |
| revPBE <sup>124</sup>                                    | 323       | 4.2                   | 3.8                   | 3.20                 | 0.931                | 0.85                   | D <sub>2</sub> O                                  |
| revPBE-DCACP <sup>124</sup>                              | 331       | 4.7                   | 4.3                   | 3.59                 | 1.114                | 1.02                   | D <sub>2</sub> O                                  |
| revPBE-D3 <sup>143</sup>                                 | 298       | 5.6                   | 4.6                   | *3.63                | 0.97                 | 0.97                   | H <sub>2</sub> O                                  |
| rVV10 <sup>154</sup>                                     | 295       | 4.6                   | 4.2                   | *3.80                | 1.078                | 1.08                   | H <sub>2</sub> O                                  |
| optB88-vdW <sup>154</sup>                                | 295       | 4.7                   | 4.4                   | *3.84                | 1.081                | 1.08                   | H <sub>2</sub> O                                  |
| Meta-GGA                                                 |           |                       |                       |                      |                      |                        |                                                   |
| M06-L                                                    | 291       | 12.2                  | 4.9                   | 3.48                 | 1.136                | 1.03                   | D <sub>2</sub> O                                  |
| revM06-L                                                 | 311       | 12.8                  | 9.9                   | 2.90                 | 1.171                | 1.06                   | D <sub>2</sub> O                                  |
| M11-L                                                    | 286       | 12.9                  | 6.9                   | 3.22                 | 1.171                | 1.06                   | D <sub>2</sub> O                                  |
| MN12-L                                                   | 296       | 11.6                  | 11.2                  | 3.24                 | 1.174                | 1.06                   | D <sub>2</sub> O                                  |
| MN15-L                                                   | 283       | 13.4                  | 13.0                  | 1.93                 | 1.280                | 1.16                   | D <sub>2</sub> O                                  |
| SCAN <sup>41</sup>                                       | 330       | -                     | -                     | 3.61                 | 1.050                | 0.96                   | D <sub>2</sub> O                                  |
| SCAN <sup>40</sup>                                       | 300       | 4.7                   | 4.4                   | -                    | -                    | -                      | H <sub>2</sub> O                                  |
| SCAN+rVV10 <sup>138</sup>                                | 300       | 4.6                   | 4.4                   | *3.80                | 1.16                 | 1.16                   | H <sub>2</sub> O                                  |
| TPSS <sup>140</sup>                                      | 350       | -                     | -                     | 3.82                 | -                    | -                      | D <sub>2</sub> O                                  |
| B97M-rV <sup>117,143</sup>                               | 298       | <sup>117</sup> 5.8    | <sup>117</sup> 4.8    | <sup>117</sup> *3.70 | <sup>143</sup> 1.12  | 1.12                   | <sup>117,143</sup> H <sub>2</sub> O               |
| Hybrid                                                   |           |                       |                       |                      |                      |                        |                                                   |
| B3LYP <sup>140</sup>                                     | 350       | 4.4                   | 4.0                   | 3.67                 | -                    | -                      | D <sub>2</sub> O                                  |
| PBE0 <sup>154,162</sup>                                  | 300       | <sup>162</sup> 4.1    | <sup>162</sup> 3.9    | <sup>162</sup> 3.71  | <sup>154</sup> 0.832 | 0.83                   | <sup>162</sup> D/ <sup>154</sup> H <sub>2</sub> O |
| PBE0-TS-vdW(SC) <sup>162</sup>                           | 300       | 4.2                   | 4.1                   | 3.62                 | -                    | -                      | D <sub>2</sub> O                                  |
| PBE0-D3 <sup>154</sup>                                   | 295       | 4.4                   | 4.1                   | *3.68                | 1.053                | 1.06                   | H <sub>2</sub> O                                  |
| revPBE0-D3 <sup>117</sup>                                | 300       | 5.3                   | 4.5                   | *3.80                | -                    | -                      | H <sub>2</sub> O                                  |
| Hybrid meta-GGA                                          |           |                       |                       |                      |                      |                        |                                                   |
| M06                                                      | 312       | 13.7                  | 4.7                   | 3.21                 | 1.031                | 1.04                   | H <sub>2</sub> O                                  |
| M06-HF                                                   | 329       | 3.9                   | 3.9                   | 3.55                 | 1.051                | 1.07                   | H <sub>2</sub> O                                  |
| M06-2X                                                   | 299       | 6.6                   | 5.5                   | 3.70                 | 1.043                | 1.05                   | H <sub>2</sub> O                                  |
| M06-2X, $E_{cut}^{\phi} = 120$ Ry                        | 290       | 6.6                   | 5.5                   | 3.71                 | -                    | -                      | H <sub>2</sub> O                                  |
| M08-HX                                                   | 298       | 8.7                   | 7.6                   | 3.59                 | 1.035                | 1.04                   | H <sub>2</sub> O                                  |
| M08-SO                                                   | 316       | 9.0                   | 5.0                   | 3.70                 | 1.033                | 1.04                   | H <sub>2</sub> O                                  |
| M11                                                      | 326       | 7.6                   | 4.4                   | 3.46                 | 1.074                | 1.09                   | H <sub>2</sub> O                                  |
| MN12-SX                                                  | 292       | 7.8                   | 6.8                   | 3.36                 | 1.025                | 1.03                   | H <sub>2</sub> O                                  |
| MN15                                                     | 316       | 11.9                  | 4.8                   | 3.26                 | 1.073                | 1.08                   | H <sub>2</sub> O                                  |
| M06-2X-D3 <sup>154</sup>                                 | 295       | 5.1                   | 4.7                   | *3.81                | 1.004                | 1.01                   | H <sub>2</sub> O                                  |
| SCAN0/ML <sup>164</sup>                                  | 300       | 4.5                   | 4.2                   | 3.71                 | 1.032                | 1.04                   | H <sub>2</sub> O                                  |
| Post-HF, double-hybrid                                   |           |                       |                       |                      |                      |                        |                                                   |
| RPA <sup>154</sup>                                       | 295       | 4.7                   | 4.2                   | *3.77                | 0.994                | 0.996                  | H <sub>2</sub> O                                  |
| MP2 <sup>154</sup>                                       | 295       | 4.7                   | 4.3                   | *3.81                | 1.020                | 1.022                  | H <sub>2</sub> O                                  |
| PWPB95-D3 <sup>154</sup>                                 | 295       | 5.8                   | 4.7                   | *3.62                | 1.002                | 1.004                  | H <sub>2</sub> O                                  |
| Experimental                                             |           |                       |                       |                      |                      |                        |                                                   |
| X-ray 2014 <sup>55</sup>                                 | 285       | 4.8                   | 4.5                   |                      | 0.99952              | 1.00                   | H <sub>2</sub> O                                  |
| X-ray 2014 <sup>55,197</sup> /Neutron 2013 <sup>58</sup> | 298       | <sup>55,197</sup> 4.6 | <sup>55,197</sup> 4.3 | <sup>58</sup> *3.80  | 0.99709              | 1.00                   | H <sub>2</sub> O                                  |
| X-ray 2014 <sup>55</sup>                                 | 307       | 4.6                   | 4.3                   |                      | 0.99442              | 1.00                   | H <sub>2</sub> O                                  |
| X-ray 2014 <sup>55</sup>                                 | 324       | 5.2                   | 4.5                   |                      | 0.98765              | 1.00                   | H <sub>2</sub> O                                  |

\*estimated from the integration of the second peak of the oxygen-hydrogen radial distribution function  $g_{OH}$ , in the same way as  $n_{OO}$ .

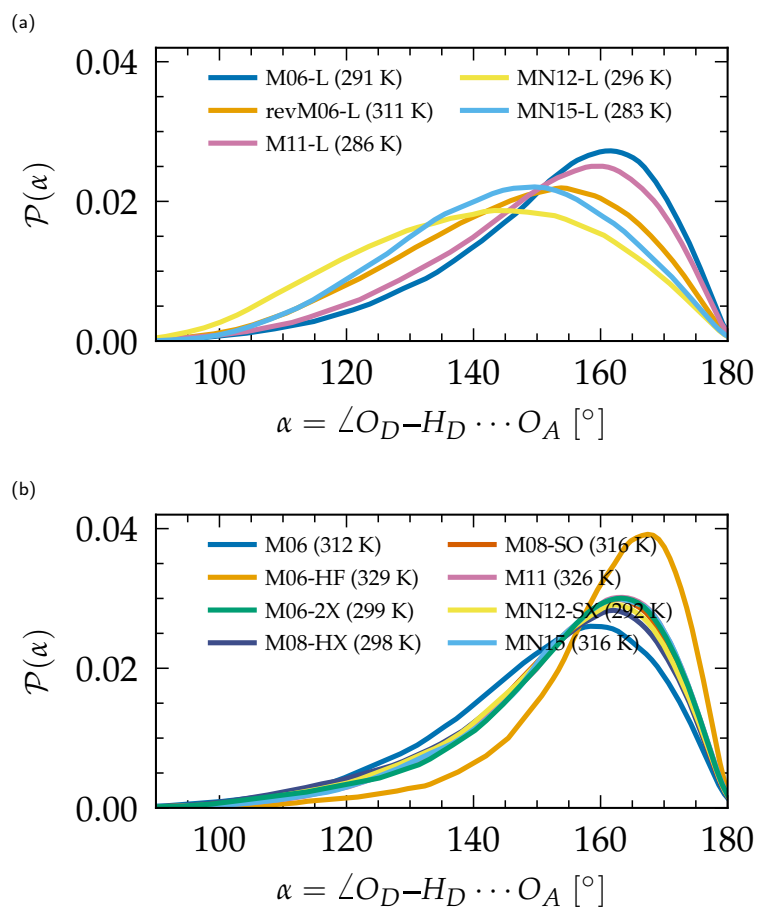

Fig. S3 Distribution  $P(\alpha)$  of the H-bond donor angle  $\alpha$  for donors in the first coordination shell. (a) Meta-GGA Minnesota functionals, (b) hybrid meta-GGA Minnesota functionals.

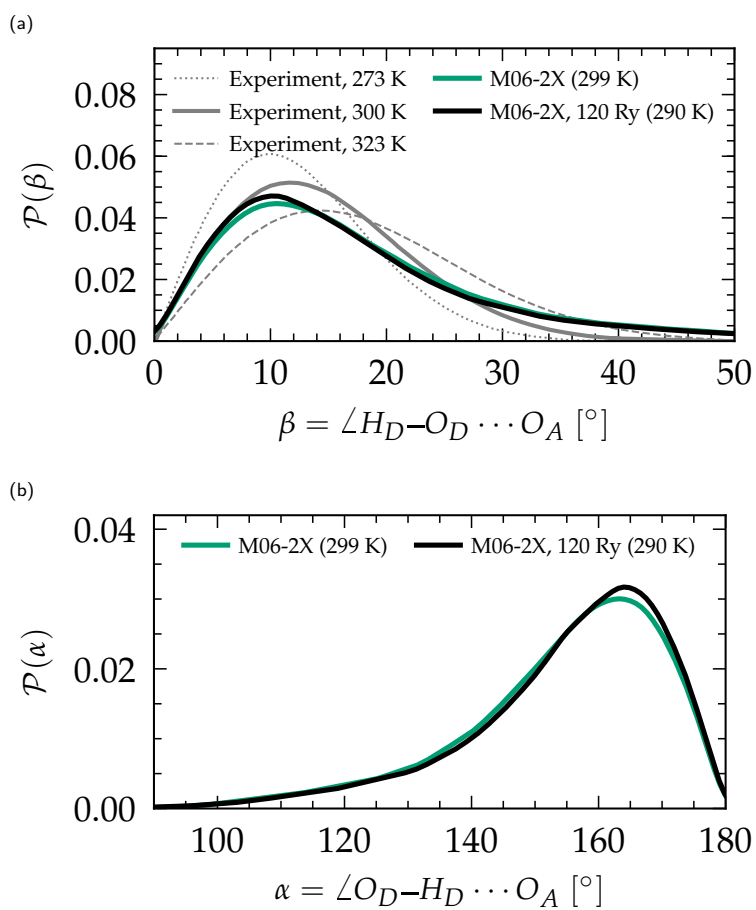

Fig. S4 H-bond angular distributions as predicted by the M06-2X Minnesota functional, with a plane-wave wavefunction cutoff energy  $E_{cut}^{\phi} = 120$  Ry (black), against 80 Ry (green). (a) Distribution  $P(\beta)$  of the H-bonding angle  $\beta$ , compared to experimental values<sup>210</sup>. (b) Distribution  $P(\alpha)$  of the H-bond donor angle  $\alpha$  for donors in the first coordination shell.

## Dynamical properties

Table S4 Dynamics of liquid water.  $L$  [Å] is the side of the cubic simulation cell,  $D_L$  the finite-size diffusion coefficient from simulation and  $D_\infty$  its analogue rescaled to infinite size (eq 4 of the main text). Results were obtained from MD simulations with various DFT functionals at temperature  $T_{\text{avg}}$  [K]. Corresponding references (cf. main text) are provided alongside the functional names.  $D_\infty^{\text{exp}}$  is the experimental diffusion coefficient at  $T_{\text{avg}}$ , as provided by a fractional-power law<sup>51</sup> fitted to experimental results<sup>47–49,51,211,212</sup>.  $D_L^{\text{exp}}$  is the experimental coefficient rescaled back to finite size (eq 4 of the main text). All diffusion coefficients are in [Å<sup>2</sup>/ps].  $\eta$  [mPa·s] is the experimental shear viscosity<sup>192</sup> of light/heavy water used for rescaling.

| Functional                               | $T_{\text{avg}}$ | $L$    | $D_L$ | $D_L^{\text{exp}}$ | $D_\infty$ | $D_\infty^{\text{exp}}$ | $\eta(T_{\text{avg}})$ | System           |
|------------------------------------------|------------------|--------|-------|--------------------|------------|-------------------------|------------------------|------------------|
| GGA                                      |                  |        |       |                    |            |                         |                        |                  |
| BLYP <sup>124</sup>                      | 319              | 12.420 | 0.10  | 0.23               | 0.18       | 0.30                    | 0.70167                | D <sub>2</sub> O |
| BLYP-DCACP <sup>124</sup>                | 308              | 12.420 | 0.17  | 0.18               | 0.23       | 0.24                    | 0.87277                | D <sub>2</sub> O |
| BLYP-D3 <sup>184</sup>                   | 298              | 15.640 | 0.08  | 0.18               | 0.12       | 0.23                    | 0.88982                | H <sub>2</sub> O |
| BLYP-D3 <sup>184</sup>                   | 328              | 15.640 | 0.20  | 0.35               | 0.29       | 0.43                    | 0.50354                | H <sub>2</sub> O |
| PBE <sup>124</sup>                       | 314              | 12.420 | 0.03  | 0.21               | 0.10       | 0.27                    | 0.77176                | D <sub>2</sub> O |
| PBE <sup>41</sup>                        | 330              | 13.108 | 0.02  | 0.29               | 0.11       | 0.38                    | 0.58027                | D <sub>2</sub> O |
| PBE-DCACP <sup>124</sup>                 | 323              | 12.420 | 0.05  | 0.25               | 0.13       | 0.33                    | 0.65294                | D <sub>2</sub> O |
| revPBE <sup>124</sup>                    | 323              | 12.420 | 0.21  | 0.25               | 0.29       | 0.33                    | 0.65294                | D <sub>2</sub> O |
| revPBE-DCACP <sup>124</sup>              | 331              | 12.420 | 0.16  | 0.29               | 0.26       | 0.39                    | 0.57100                | D <sub>2</sub> O |
| revPBE-D3 <sup>143</sup>                 | 298              | 12.420 | 0.19  | 0.17               | 0.25       | 0.23                    | 0.88982                | H <sub>2</sub> O |
| optB88-vdW <sup>40</sup>                 | 300              | 9.850  | 0.07  | 0.17               | 0.14       | 0.24                    | 0.85072                | H <sub>2</sub> O |
| Meta-GGA                                 |                  |        |       |                    |            |                         |                        |                  |
| M06-L                                    | 291              | 12.445 | 0.30  | 0.12               | 0.34       | 0.15                    | 1.32310                | D <sub>2</sub> O |
| revM06-L                                 | 311              | 12.445 | 0.65  | 0.19               | 0.71       | 0.26                    | 0.81967                | D <sub>2</sub> O |
| M11-L                                    | 286              | 12.445 | 0.52  | 0.10               | 0.55       | 0.13                    | 1.53360                | D <sub>2</sub> O |
| MN12-L                                   | 296              | 12.445 | 0.11  | 0.13               | 0.15       | 0.18                    | 1.15640                | D <sub>2</sub> O |
| MN15-L                                   | 283              | 12.445 | 0.06  | 0.09               | 0.09       | 0.12                    | 1.68780                | D <sub>2</sub> O |
| SCAN <sup>41</sup>                       | 330              | 12.217 | 0.19  | 0.28               | 0.29       | 0.38                    | 0.58027                | D <sub>2</sub> O |
| SCAN <sup>184</sup>                      | 328              | 12.660 | 0.14  | 0.32               | 0.25       | 0.43                    | 0.50354                | H <sub>2</sub> O |
| SCAN <sup>40</sup>                       | 300              | 9.850  | 0.06  | 0.17               | *0.09      | 0.24                    | 0.85072                | H <sub>2</sub> O |
| SCAN <sup>184</sup>                      | 298              | 12.660 | 0.03  | 0.17               | 0.08       | 0.23                    | 0.88982                | H <sub>2</sub> O |
| SCAN/ML <sup>163</sup>                   | 300              | 11.817 | 0.05  | 0.18               | 0.11       | 0.24                    | 0.85072                | H <sub>2</sub> O |
| TPSS <sup>140</sup>                      | 350              | 9.939  | 0.03  | 0.36               | 0.20       | 0.53                    | 0.43331                | D <sub>2</sub> O |
| B97M-rV <sup>117</sup>                   | 300              | 12.420 | 0.21  | 0.18               | 0.27       | 0.24                    | 0.85072                | H <sub>2</sub> O |
| Hybrid                                   |                  |        |       |                    |            |                         |                        |                  |
| B3LYP <sup>140</sup>                     | 350              | 9.939  | 0.30  | 0.36               | 0.47       | 0.53                    | 0.43331                | D <sub>2</sub> O |
| PBE0 <sup>162</sup>                      | 300              | 12.400 | 0.07  | 0.15               | 0.12       | 0.20                    | 1.04660                | D <sub>2</sub> O |
| PBE0-TS-vdW(SC) <sup>162</sup>           | 300              | 12.400 | 0.10  | 0.15               | 0.15       | 0.20                    | 1.04660                | D <sub>2</sub> O |
| revPBE0-D3 <sup>117</sup>                | 300              | 12.420 | 0.21  | 0.18               | 0.27       | 0.24                    | 0.85072                | H <sub>2</sub> O |
| Hybrid meta-GGA                          |                  |        |       |                    |            |                         |                        |                  |
| M06                                      | 312              | 9.939  | 0.69  | 0.22               | 0.79       | 0.31                    | 0.66506                | H <sub>2</sub> O |
| M06-HF                                   | 329              | 9.939  | 0.16  | 0.30               | 0.30       | 0.44                    | 0.49563                | H <sub>2</sub> O |
| M06-2X                                   | 299              | 9.939  | 0.31  | 0.16               | 0.38       | 0.23                    | 0.86991                | H <sub>2</sub> O |
| M06-2X, $E_{\text{cut}}^{\phi} = 120$ Ry | 290              | 9.939  | 0.33  | 0.13               | 0.39       | 0.19                    | 1.08400                | H <sub>2</sub> O |
| M08-HX                                   | 298              | 9.939  | 0.18  | 0.16               | 0.25       | 0.23                    | 0.88982                | H <sub>2</sub> O |
| M08-SO                                   | 316              | 9.939  | 0.24  | 0.23               | 0.35       | 0.34                    | 0.61743                | H <sub>2</sub> O |
| M11                                      | 326              | 9.939  | 0.31  | 0.29               | 0.44       | 0.42                    | 0.52001                | H <sub>2</sub> O |
| MN12-SX                                  | 292              | 9.939  | 0.14  | 0.14               | 0.20       | 0.20                    | 1.02640                | H <sub>2</sub> O |
| MN15                                     | 316              | 9.939  | 0.30  | 0.23               | 0.41       | 0.34                    | 0.61743                | H <sub>2</sub> O |
| SCAN0/ML <sup>164</sup>                  | 300              | 24.575 | 0.11  | 0.17               | 0.13       | 0.20                    | 1.04660                | D <sub>2</sub> O |
| SCAN0/ML <sup>164</sup>                  | 300              | 24.575 | 0.12  | 0.21               | 0.15       | 0.24                    | 0.85072                | H <sub>2</sub> O |
| Post-HF                                  |                  |        |       |                    |            |                         |                        |                  |
| RPA/ML <sup>165</sup>                    | 300              | 11.817 | 0.17  | 0.18               | 0.23       | 0.24                    | 0.85072                | H <sub>2</sub> O |
| MP2 <sup>154</sup>                       | 295              | 12.335 | 0.07  | 0.16               | 0.12       | 0.21                    | 0.95417                | H <sub>2</sub> O |
| CCSD(T)/ML PIMD <sup>197</sup>           | 298              | 15.660 | 0.20  | 0.18               | 0.24       | 0.23                    | 0.88982                | H <sub>2</sub> O |

\*rescaled to infinite size with the actual viscosity obtained with the SCAN functional<sup>40</sup>.

Table S5 Dynamics of liquid water. First-order  $\tau_1$  and second-order  $\tau_2$  orientational relaxation times [ps] calculated from the orientational auto-correlation function (eq 5 of the main text), between respectively the geometric dipoles  $\mu$ , OH, and HH vectors. Results were obtained from MD simulations with various DFT functionals at temperature  $T_{avg}$  [K]. Corresponding references (cf. main text) are provided alongside the functional names. Note that  $\tau_{1,2}$  are highly sensitive to statistical sampling and require trajectories that are sufficiently long (approximately three times higher than their value) to be accurately converged, in addition to a sufficient equilibration phase at the beginning of the NVE sampling. Additionally, the fitting or integration methods used for their calculation vary between studies, and experimental results exhibit non-negligible deviations. Nevertheless, we provide these values as a qualitative comparison (with  $\sim 10\%$  of error tolerance for Minnesota functionals).

| Functional                                        | $T_{avg}$ | $\tau_1^\mu$      | $\tau_2^\mu$      | $\tau_1^{OH}$    | $\tau_2^{OH}$     | $\tau_1^{HH}$    | $\tau_2^{HH}$     | System           |
|---------------------------------------------------|-----------|-------------------|-------------------|------------------|-------------------|------------------|-------------------|------------------|
| GGA                                               |           |                   |                   |                  |                   |                  |                   |                  |
| BLYP <sup>124</sup>                               | 319       | <sup>a</sup> 7.5  | <sup>a</sup> 3.0  | -                | -                 | -                | -                 | D <sub>2</sub> O |
| BLYP-DCACP <sup>124</sup>                         | 308       | <sup>a</sup> 3.6  | <sup>a</sup> 1.7  | -                | -                 | -                | -                 | D <sub>2</sub> O |
| PBE <sup>124</sup>                                | 314       | <sup>a</sup> 36.9 | <sup>a</sup> 15.6 | -                | -                 | -                | -                 | D <sub>2</sub> O |
| PBE <sup>41</sup>                                 | 330       | -                 | -                 | -                | <sup>b</sup> 7.1  | -                | -                 | D <sub>2</sub> O |
| PBE-DCACP <sup>124</sup>                          | 323       | <sup>a</sup> 32.7 | <sup>a</sup> 10.0 | -                | -                 | -                | -                 | D <sub>2</sub> O |
| revPBE <sup>124</sup>                             | 323       | <sup>a</sup> 2.7  | <sup>a</sup> 1.3  | -                | -                 | -                | -                 | D <sub>2</sub> O |
| revPBE-DCACP <sup>124</sup>                       | 331       | <sup>a</sup> 5.4  | <sup>a</sup> 2.1  | -                | -                 | -                | -                 | D <sub>2</sub> O |
| revPBE-D3 <sup>204</sup>                          | 300       | <sup>b</sup> 4.6  | <sup>b</sup> 1.7  | <sup>b</sup> 5.4 | <sup>b</sup> 2.2  | <sup>b</sup> 5.9 | <sup>b</sup> 2.6  | H <sub>2</sub> O |
| Meta-GGA                                          |           |                   |                   |                  |                   |                  |                   |                  |
| M06-L                                             | 291       | 1.8               | 0.8               | 2.3              | 1.0               | 2.7              | 1.3               | D <sub>2</sub> O |
| revM06-L                                          | 311       | 0.4               | 0.2               | 0.5              | 0.3               | 0.6              | 0.3               | D <sub>2</sub> O |
| M11-L                                             | 286       | 1.0               | 0.5               | 1.3              | 0.6               | 1.4              | 0.7               | D <sub>2</sub> O |
| MN12-L                                            | 296       | 0.4               | 0.2               | 0.5              | 0.2               | 0.5              | 0.3               | D <sub>2</sub> O |
| MN15-L                                            | 283       | 0.4               | 0.1               | 0.4              | 0.2               | 0.4              | 0.2               | D <sub>2</sub> O |
| SCAN <sup>41</sup>                                | 330       | -                 | -                 | -                | <sup>b</sup> 2.9  | -                | -                 | D <sub>2</sub> O |
| SCAN/ML <sup>163</sup>                            | 300       | -                 | <sup>b</sup> 12.9 | -                | <sup>b</sup> 15.7 | -                | <sup>b</sup> 21.5 | H <sub>2</sub> O |
| Hybrid                                            |           |                   |                   |                  |                   |                  |                   |                  |
| revPBE0-D3 <sup>204</sup>                         | 300       | <sup>b</sup> 3.4  | <sup>b</sup> 1.4  | <sup>b</sup> 4.3 | <sup>b</sup> 1.7  | <sup>b</sup> 4.8 | <sup>b</sup> 2.0  | H <sub>2</sub> O |
| Hybrid meta-GGA                                   |           |                   |                   |                  |                   |                  |                   |                  |
| M06                                               | 312       | 1.2               | 0.5               | 1.2              | 0.6               | 1.2              | 0.6               | H <sub>2</sub> O |
| M06-HF                                            | 329       | 4.7               | 2.5               | 6.2              | 3.3               | 7.3              | 3.6               | H <sub>2</sub> O |
| M06-2X                                            | 299       | 2.7               | 1.1               | 3.0              | 1.3               | 3.2              | 1.4               | H <sub>2</sub> O |
| M06-2X, $E_{cut}^\phi = 120$ Ry                   | 290       | 2.6               | 1.2               | 3.3              | 1.5               | 3.8              | 1.7               | H <sub>2</sub> O |
| M08-HX                                            | 298       | 2.8               | 1.5               | 3.0              | 1.6               | 3.2              | 1.8               | H <sub>2</sub> O |
| M08-SO                                            | 316       | 2.8               | 1.3               | 3.0              | 1.4               | 3.2              | 1.6               | H <sub>2</sub> O |
| M11                                               | 326       | 3.0               | 1.5               | 3.6              | 1.6               | 3.9              | 1.9               | H <sub>2</sub> O |
| MN12-SX                                           | 292       | 3.7               | 1.6               | 4.4              | 2.0               | 4.9              | 2.9               | H <sub>2</sub> O |
| MN15                                              | 316       | 2.0               | 1.0               | 2.0              | 1.1               | 2.0              | 1.3               | H <sub>2</sub> O |
| SCAN0/ML <sup>164</sup>                           | 300       | -                 | -                 | -                | <sup>b</sup> 4.6  | -                | -                 | D <sub>2</sub> O |
| SCAN0/ML <sup>164</sup>                           | 300       | -                 | -                 | -                | <sup>b</sup> 4.1  | -                | -                 | H <sub>2</sub> O |
| Post-HF                                           |           |                   |                   |                  |                   |                  |                   |                  |
| RPA/ML <sup>165</sup>                             | 300       | -                 | <sup>b</sup> 1.7  | -                | <sup>b</sup> 2.2  | -                | <sup>b</sup> 2.6  | H <sub>2</sub> O |
| CCSD(T)/ML PIMD <sup>197</sup>                    | 298       | -                 | <sup>b</sup> 1.3  | -                | <sup>b</sup> 1.7  | -                | <sup>b</sup> 2.1  | H <sub>2</sub> O |
| CCSD(T)/ML PIMD <sup>197</sup>                    | 298       | -                 | 2.8               | -                | 3.0               | -                | 3.3               | H <sub>2</sub> O |
| Experimental                                      |           |                   |                   |                  |                   |                  |                   |                  |
| NMR 1970 <sup>2,199</sup>                         | 300       | 4.8               | -                 | -                | -                 | -                | -                 | H <sub>2</sub> O |
| NMR 1971 <sup>199,213</sup>                       | 300       | -                 | 1.9               | -                | -                 | -                | -                 | H <sub>2</sub> O |
| NMR 1967 (for various T) <sup>42</sup>            | 300       | -                 | 2.4               | -                | -                 | -                | -                 | H <sub>2</sub> O |
| Infrared 2008 <sup>200</sup> /2010 <sup>201</sup> | 298       | -                 | -                 | -                | 2.5               | -                | 2.5               | H <sub>2</sub> O |
| Infrared 2008 <sup>200</sup> /2010 <sup>201</sup> | 298       | -                 | -                 | -                | 3.0               | -                | -                 | D <sub>2</sub> O |
| NMR 2001 (for various T) <sup>52</sup>            | 300       | -                 | -                 | -                | 2.4               | -                | -                 | D <sub>2</sub> O |
| NMR 1985 <sup>45</sup> /1987 <sup>46</sup>        | 298       | -                 | -                 | -                | 1.9-2.0           | -                | -                 | H <sub>2</sub> O |
| NMR 1982 <sup>50</sup>                            | 298       | -                 | -                 | -                | 1.7               | -                | -                 | H <sub>2</sub> O |
| NMR 1966 <sup>198</sup>                           | 298       | -                 | -                 | -                | 2.6               | -                | -                 | H <sub>2</sub> O |
| NMR 1976 <sup>43</sup>                            | 303       | -                 | -                 | -                | -                 | -                | 2.1               | H <sub>2</sub> O |
| NMR 1976 <sup>43</sup>                            | 303       | -                 | -                 | -                | -                 | -                | 2.5               | D <sub>2</sub> O |

<sup>a</sup> $\tau_{1,2}$  were calculated from fitting the auto-correlation functions  $C_{1,2}(t)$  with the exponential form  $A \exp[-(t/\tau_{1,2})^\alpha]$ .

<sup>b</sup>The tail of the auto-correlation function was fitted with  $\exp(-t/\tau_{1,2})$  and integrated from zero to  $\infty$  to give  $\tau_{1,2}$ .

Others were obtained with the fit  $A \exp(-t/\tau_{1,2})$  in the exponential regime after the initial subpicosecond librational decay.
